# Supplementary material
Source: Springer Nature journal article supplement (https://www.springermedizin.de/resource/supplementary/12885_2008_1123_MOESM1_ESM.pdf/9471176)

a. Normal colon

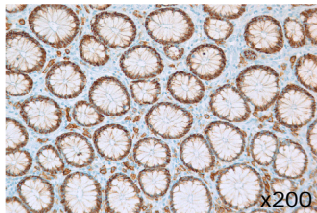

b. Moderately differentiated adenocarcinoma, epithelial syndecan-1

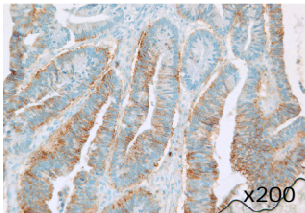

c. Poorly differentiated adenocarcinoma

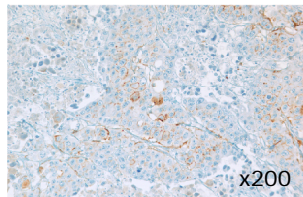

d. Moderately differentiated adenocarcinoma, epithelial and stromal syndecan-1

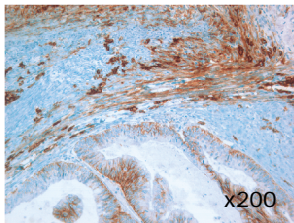

e. Moderately differentiated adenocarcinoma, syndecan-1

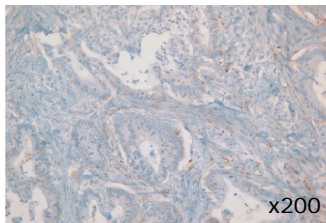

f. Moderately differentiated adenocarcinoma, fascin

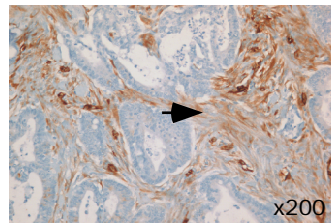

Supplement: MOESM1 [file 9471176]
